# Supplementary material for: Out of plane stacking of InSe-based heterostructures towards high performance electronic and optoelectronic devices using a graphene electrode
Source: Royal Society of Chemistry journal article supplement (doi:10.1039/c8tc04459g), 2018-01-01
Supplement: c8tc04459g1.pdf [file c8tc04459g1.pdf]

**Supporting Information for**

**Out of plane stacking InSe-based heterostructures towards high performance  
electronic and optoelectronic devices using graphene electrode**

Wei Gao<sup>1</sup>, Zhaoqiang Zheng<sup>1\*</sup>, Yongtao Li<sup>1</sup>, Congxin Xia<sup>2</sup>, Juan Du<sup>2</sup>, Yu Zhao<sup>1</sup>,  
Jingbo Li<sup>1,3,4\*</sup>

<sup>1</sup> College of Materials and Energy, Guangdong University of Technology, Guangzhou  
510006, P. R. China.

<sup>2</sup> Physics and Electronic Engineering College, Henan Normal University, Xinxiang  
453007, P. R. China.

<sup>3</sup> State Key Laboratory of Precision Electronics Manufacturing Technology and  
Equipment, Guangdong University of Technology, Guangzhou 510006, P. R. China.

<sup>4</sup> State Key Laboratory of Superlattices and Microstructures, Institute of  
Semiconductors, Chinese Academy of Sciences, Beijing 100083, P. R. China.

\* Corresponding authors: zhengzhq5@mail2.sysu.edu.cn; jbli@semi.ac.cn

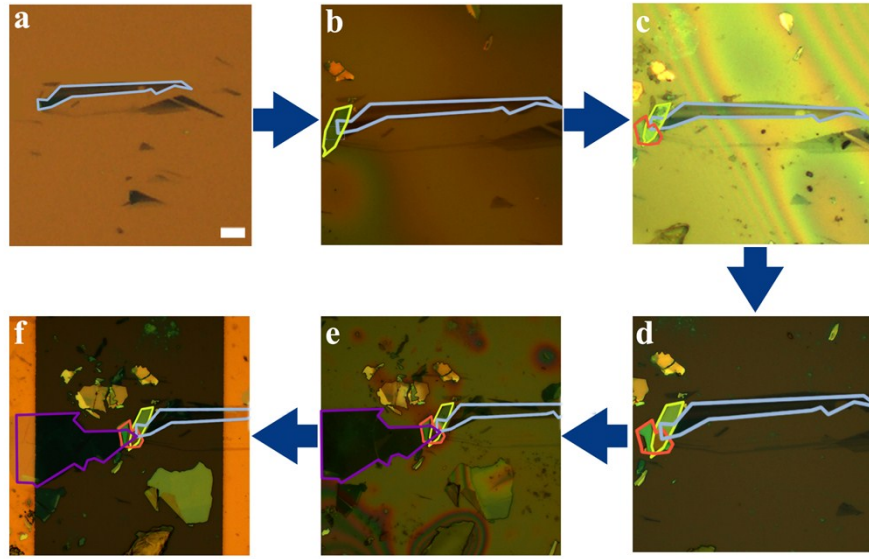

**Fig. S1** Fabrication process of the Gr-InSe/WSe<sub>2</sub>-Gr heterostructure device. (a) Exfoliation of bottom graphene on SiO<sub>2</sub>/Si substrate. The scale bar is 10  $\mu$ m. (b) Stacking of WSe<sub>2</sub>. (c) Stacking of InSe with PMMA film. (d) Remove PMMA. (e) Stacking of top graphene. (f) Patterning metal contacts to top-bottom graphene.

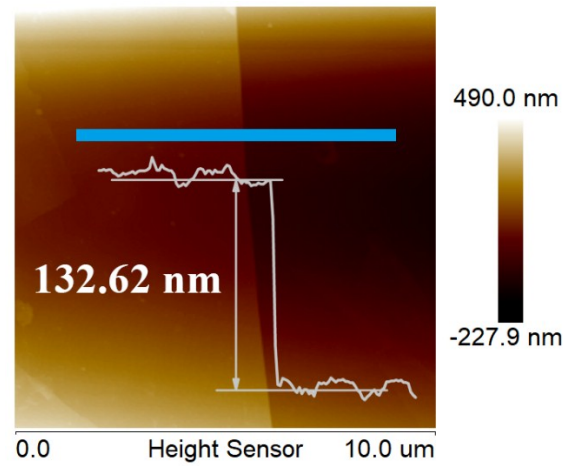

**Fig. S2** Atomic Force microscopy (AFM) topography at the interface of the top graphene.

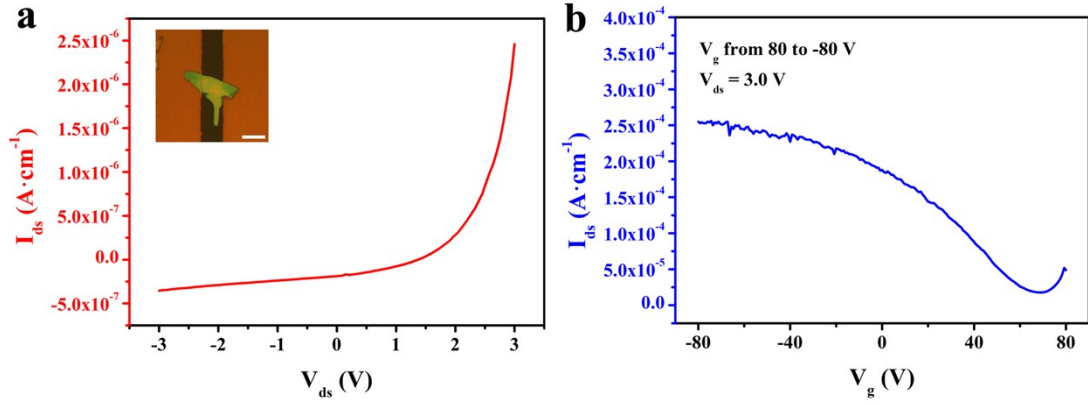

**Fig. S3** Electrical performance of the Au-InSe-Au heterostructure device. (a)  $I_{ds}$ - $V_{ds}$  curve of the device under dark condition. Inset is the optical image of the FETs device showing the red overlapped region, the scale bar is 10  $\mu\text{m}$ . (b) Transfer curves as a function of gate voltage under dark condition.

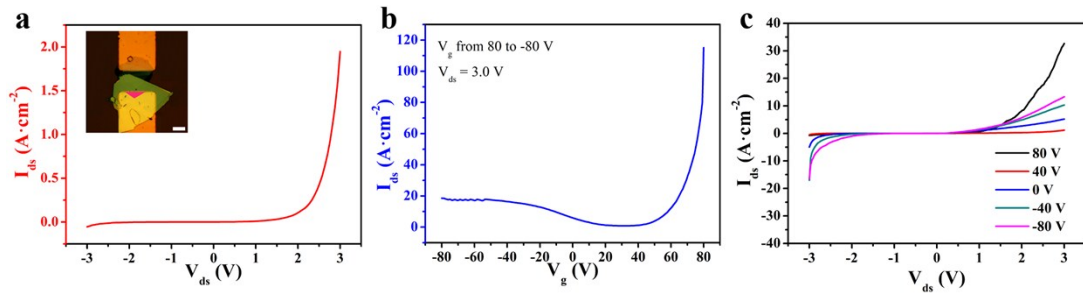

**Fig. S4** Electrical performance of the Au-WSe<sub>2</sub>-Gr heterostructure device. (a)  $I_{ds}$ - $V_{ds}$  curve of the device under dark condition. Inset is the optical image of the FETs device showing the red overlapped region, the scale bar is 10  $\mu\text{m}$ . (b) Transfer curves as a function of gate voltage under dark condition. (c) Output characteristic curves of the device with gate voltage from 80 V to -80 V.

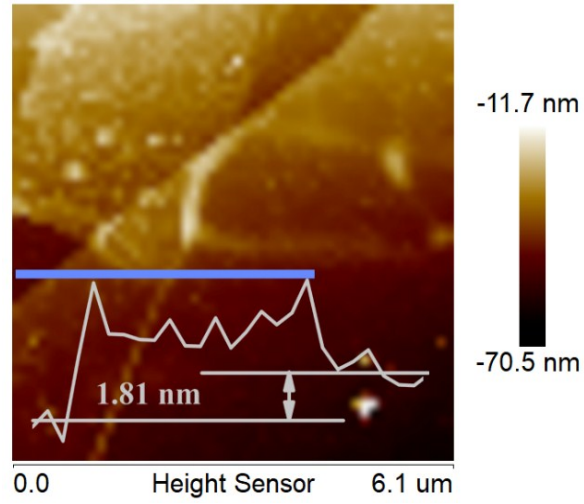

**Fig. S5** Atomic Force microscopy (AFM) topography at the interface of the top graphene.

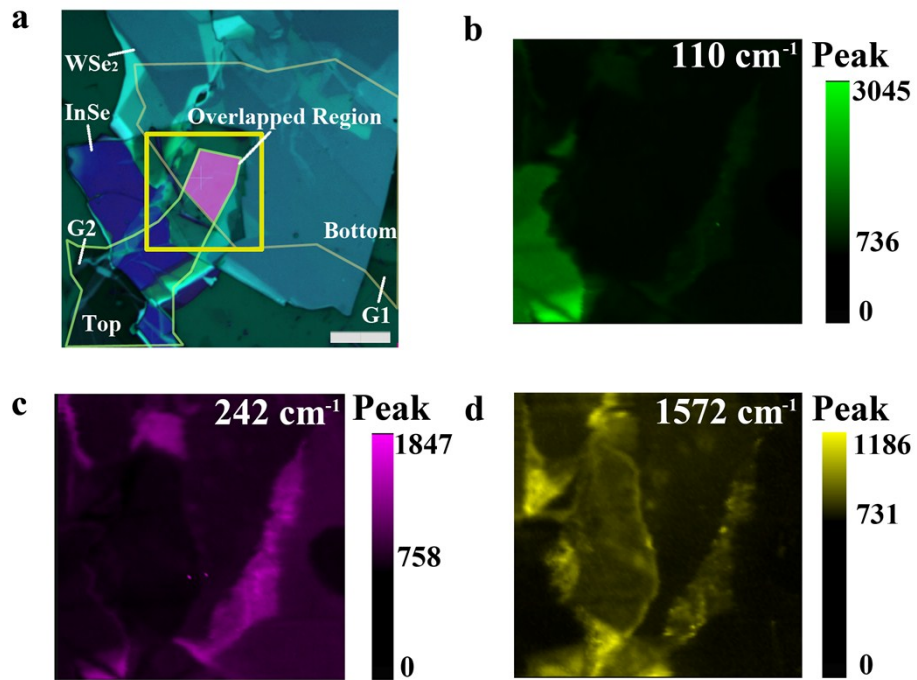

**Fig. S6** (a) Optical image of the heterostructure with larger overlapped region. The Raman mapping of the yellow rectangle in (a): (b)  $110\text{ cm}^{-1}$  (InSe); (c)  $242\text{ cm}^{-1}$  (WSe<sub>2</sub>); (d)  $1572\text{ cm}^{-1}$  (Graphene). The scale bar is  $10\text{ }\mu\text{m}$ . The overlapped region is about  $159\text{ }\mu\text{m}^2$ .

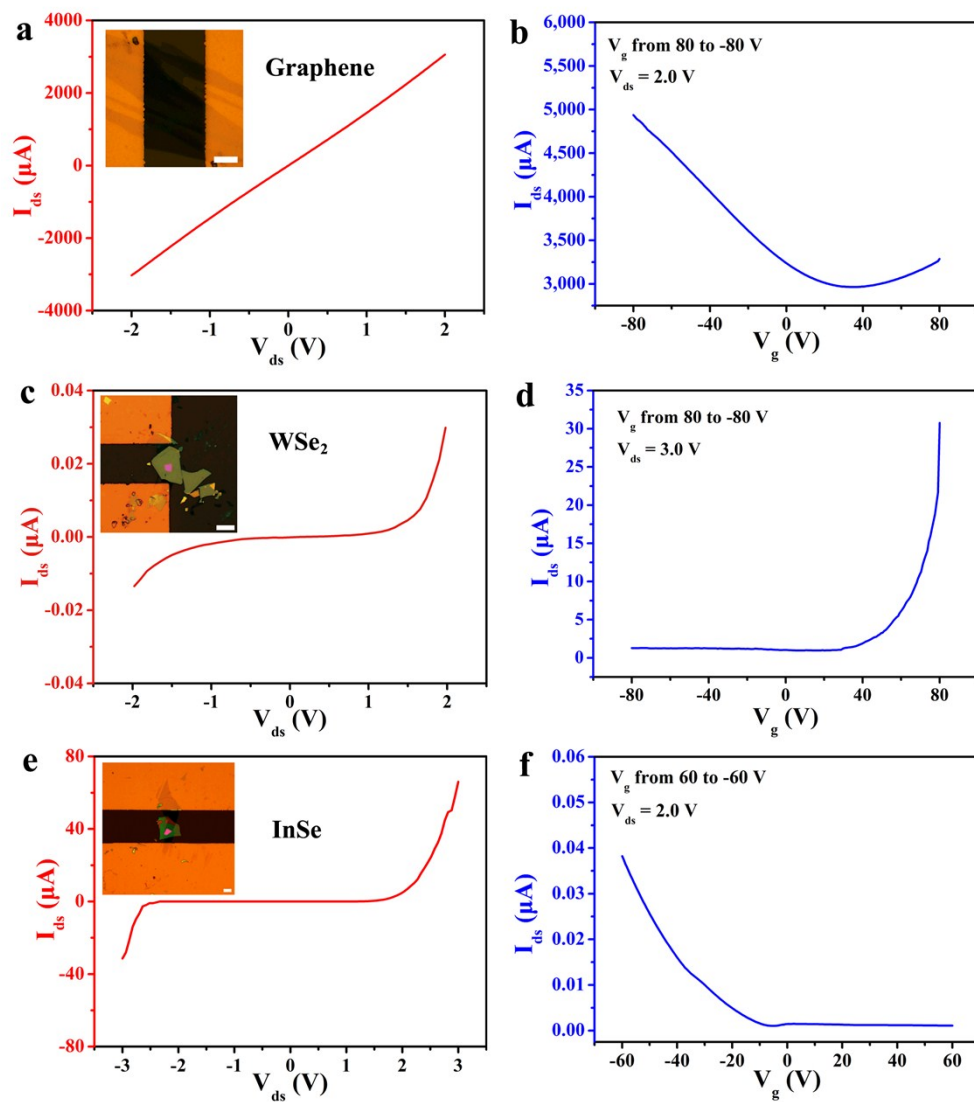

**Fig. S7** Electrical properties of the FETs devices for graphene, vertical Gr-WSe<sub>2</sub>-Gr and Gr-InSe-Gr. (a), (c), (e)  $I_{ds}$ - $V_{ds}$  characteristic curves without the gate voltage. (b), (d), (f) Transfer curves. All scale bars are 10  $\mu m$ . The pink regions are overlapped areas.

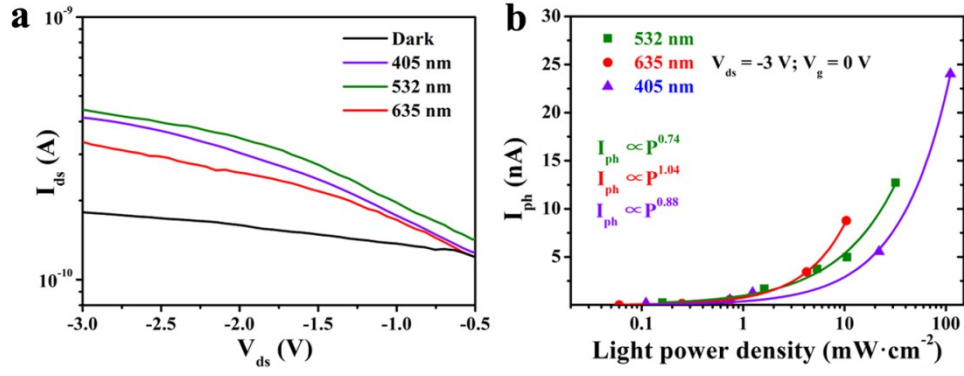

**Fig. S8** (a)  $I_{ds}$ - $V_{ds}$  of the Gr-InSe/WSe<sub>2</sub>-Gr photodetector under 405 nm, 532 nm and 635 nm or without illumination, the light power density is  $0.27 \text{ mW}\cdot\text{cm}^{-2}$ ,  $0.16 \text{ mW}\cdot\text{cm}^{-2}$  and  $0.25 \text{ mW}\cdot\text{cm}^{-2}$ ; respectively. (b) Light power density dependence of the photocurrent.

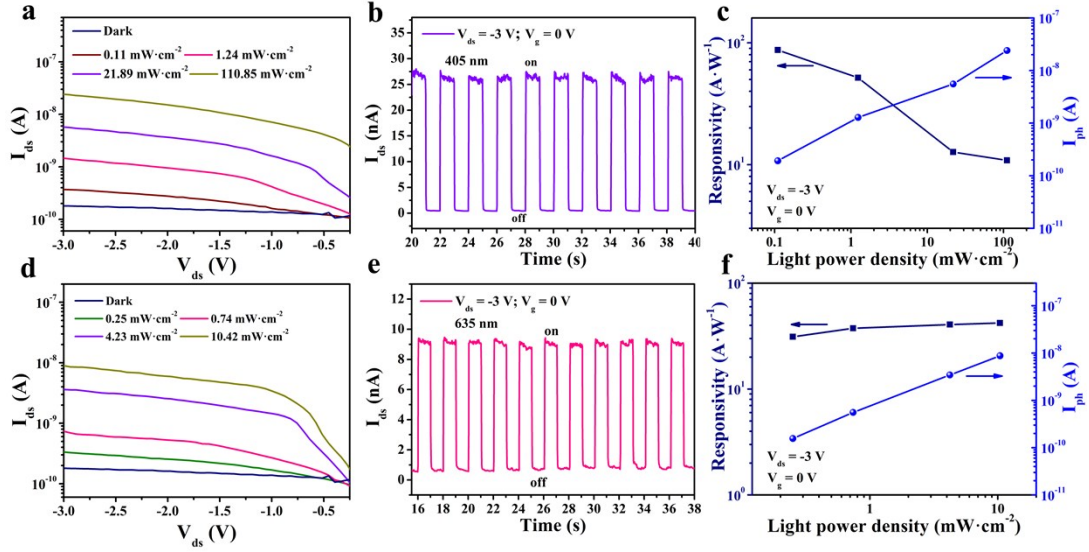

**Fig. S9** Optoelectrical properties of the Gr-InSe/WSe<sub>2</sub>-Gr. (a)  $I_{ds}$ - $V_{ds}$  curves dependent on the light power density under a 405 nm illumination and at dark. (b) Time trace of  $I_{ds}$  under a 405 nm illumination (110  $\text{mW}\cdot\text{cm}^{-2}$ ). (c) Photoresponsivity and photocurrent as a function of light power density under 405 nm. (d)  $I_{ds}$ - $V_{ds}$  curves dependent on the light power density under a 635 nm illumination and at dark. (e) Time trace of  $I_{ds}$  under a 635 nm illumination (10.42  $\text{mW}\cdot\text{cm}^{-2}$ ). (f) Photoresponsivity and photocurrent as a function of light power density under 635 nm.

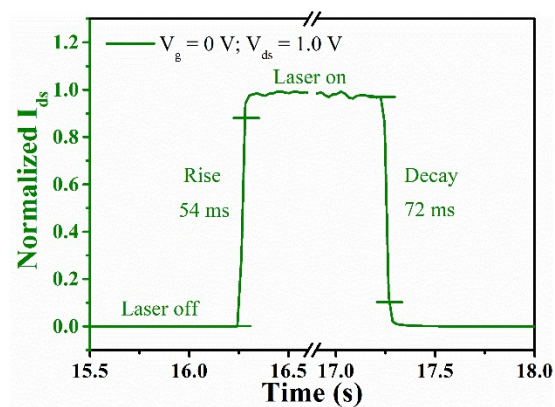

**Fig. S10** Rising and decay time of the Gr-InSe-Gr photodetector under a 532 nm illumination ( $P_{\text{laser}} = 238.9 \text{ mW} \cdot \text{cm}^{-2}$ ).



**Table S1** Comparison of figures-of-merit for vertical graphene-photodetectors based on 2D layered materials

| Materials                                                  | Measurement condition                                       | Responsivity (A/W) | EQE (%)              | D* (Jones)            | Response time | Ref.         |
|------------------------------------------------------------|-------------------------------------------------------------|--------------------|----------------------|-----------------------|---------------|--------------|
| Graphene-WSe <sub>2</sub> /p-InSe-Graphene                 | 532 nm<br>V <sub>g</sub> = 0 V<br>V <sub>ds</sub> = 3 V     | 83                 | 1.93×10 <sup>4</sup> | 1.55×10 <sup>12</sup> | 36ms /18ms    | In this work |
| Graphene-MoTe <sub>2</sub> -Graphene                       | 1064 nm<br>V <sub>g</sub> = 30 V<br>V <sub>ds</sub> = 0 V   | 0.11               | 12.9                 | /                     | 24μs          | 1            |
| Graphene-n-InSe-Graphene                                   | 633 nm<br>V <sub>g</sub> = 0 V<br>V <sub>ds</sub> = 2 V     | 10 <sup>5</sup>    | 10 <sup>5</sup>      | 10 <sup>13</sup>      | /             | 2            |
| Graphene-MoS <sub>2</sub> -Graphene                        | 514 nm<br>V <sub>g</sub> = -60 V<br>V <sub>ds</sub> = 0.5 V | /                  | 25                   | /                     | 50μs          | 3            |
| Graphene-p-GaSe/n-InSe-Graphene                            | 410 nm<br>V <sub>g</sub> = 0 V<br>V <sub>ds</sub> = 2 V     | 350                | /                    | 3.7×10 <sup>12</sup>  | 2μs           | 4            |
| Graphene-Ta <sub>2</sub> O <sub>5</sub> -Graphene          | 532 nm<br>V <sub>ds</sub> = 1 V                             | 10 <sup>3</sup>    | /                    | /                     | 0.75s         | 5            |
| Graphene-WSe <sub>2</sub> /GaSe-Graphene                   | 520 nm<br>V <sub>g</sub> = 0 V<br>V <sub>ds</sub> = -1.5 V  | 6.2±0.2            | 1490±50              | /                     | 30μs          | 6            |
| Graphene-WSe <sub>2</sub> -Graphene                        | 759 nm<br>V <sub>g</sub> = 0 V<br>V <sub>ds</sub> = 0.5 V   | /                  | 7.3                  | /                     | 1.6ns         | 7            |
| h-BN-Graphene-MoS <sub>2</sub> /WSe <sub>2</sub> -Graphene | 532 nm<br>V <sub>g</sub> = 0 V<br>V <sub>ds</sub> = 0 V     | 0.12               | 34                   | /                     | /             | 8            |

**Table S2** Comparison of figures-of-merit for lateral graphene-photodetectors based on 2D materials

| Materials                                            | Measurement condition                                    | Responsivity (A/W) | EQE (%)              | D* (Jones)            | Response time | Ref.         |
|------------------------------------------------------|----------------------------------------------------------|--------------------|----------------------|-----------------------|---------------|--------------|
| Graphene-WSe <sub>2</sub> /p-InSe-Graphene           | 532 nm<br>V <sub>g</sub> = 0 V<br>V <sub>ds</sub> = 3 V  | 83                 | 1.93×10 <sup>4</sup> | 1.55×10 <sup>12</sup> | 36ms/18ms     | In this work |
| Graphene-n-InSe-Graphene                             | 633 nm<br>V <sub>g</sub> = 0 V<br>V <sub>ds</sub> = 2 V  | 4×10 <sup>3</sup>  | 5×10 <sup>3</sup>    | 10 <sup>10</sup>      | 0.1 ms        | 2            |
| Graphene-n-InSe-Graphene                             | 500 nm<br>V <sub>g</sub> = 0 V<br>V <sub>ds</sub> = 10 V | 60                 | 14850                | /                     | 120μs+5s      | 9            |
| MoS <sub>2</sub> -Glassy-Graphene                    | 532 nm<br>V <sub>g</sub> = 0 V<br>V <sub>ds</sub> = 1 V  | 0.0123             | /                    | 1.8×10 <sup>10</sup>  | 35s           | 10           |
| Graphene-WS <sub>2</sub> /MoS <sub>2</sub> -Graphene | 532 nm<br>V <sub>g</sub> = 0 V<br>V <sub>ds</sub> = 10 V | 2340               | 5460                 | 4.1×10 <sup>11</sup>  | >1s           | 11           |
| Graphene-WS <sub>2</sub> -Graphene                   | 532 nm<br>V <sub>g</sub> = 80 V<br>V <sub>ds</sub> = 5 V | 4500               | /                    | /                     | 2ms           | 12           |

1. Zhang, K. et al. Ultrasensitive near-infrared photodetectors based on a graphene-MoTe<sub>2</sub>-Graphene vertical van der waals heterostructure. *ACS Appl. Mater. Inter.* **9**, 5392-5398 (2017).
2. Mudd, G. W. et al. High broad-band photoresponsivity of mechanically formed InSe-graphene van der Waals heterostructures. *Adv. Mater.* **27**, 3760-3766 (2015).
3. Yu, W. J. et al. Highly efficient gate-tunable photocurrent generation in vertical heterostructures of layered materials. *Nat. Nanotechnol.* **8**, 952 (2013).
4. Yan, F. et al. Fast, multicolor photodetection with graphene-contacted p-GaSe/n-InSe van der Waals heterostructures. *Nanotechnology* **28**, 27LT01 (2017).
5. Liu, C. et al. Graphene photodetectors with ultra-broadband and high responsivity

- at room temperature. *Nat. Nanotechnol.* **9**, 273-278 (2014).
6. Wei, X. et al. Fast gate-tunable photodetection in the graphene sandwiched WSe<sub>2</sub>/GaSe heterojunctions. *Nanoscale* **9**, 8388-8392 (2017).
  7. Massicotte, M. et al. Picosecond photoresponse in van der Waals heterostructures. *Nat. Nanotechnol.* **11**, 42 (2016).
  8. Lee, C. et al. Atomically thin p-n junctions with van der Waals heterointerfaces. *Nat. Nanotechnol.* **9**, 676-681 (2014).
  9. Luo, W. et al. Gate tuning of high-performance InSe-based photodetectors using Graphene Electrodes. *Adv. Opt. Mater.* **3**, 1418-1423 (2015).
  10. Xu, H. et al. High detectivity and transparent few-layer MoS<sub>2</sub>/Glassy-Graphene heterostructure photodetectors. *Adv. Mater.* (2018).
  11. Tan, H. et al. Lateral graphene-contacted vertically stacked WS<sub>2</sub>/MoS<sub>2</sub> hybrid photodetectors with large gain. *Adv. Mater.* **29**, (2017).
  12. Aji, A. S. et al. High mobility WS<sub>2</sub> transistors realized by multilayer graphene electrodes and application to high responsivity flexible photodetectors. *Adv. Funct. Mater.* **27**, (2017).
